# Supplementary material for: A trypsin–calcium carbonate hybrid nanosphere based enzyme reactor with good stability and reusability
Source: Royal Society of Chemistry journal article supplement (doi:10.1039/c8nj04282a), 2018-01-01
Supplement: c8nj04282a1.pdf [file c8nj04282a1.pdf]

## Supporting information

### Trypsin-calcium carbonate hybrid nanospheres based enzyme reactor with good stability and reusability

Jean Claude Munyemana<sup>a</sup>, Huixia He<sup>a</sup>, Caihong Fu<sup>a</sup>, Wenyu Wei<sup>a</sup>, Jing Tian<sup>a</sup>, Jianxi Xiao<sup>a, \*</sup>

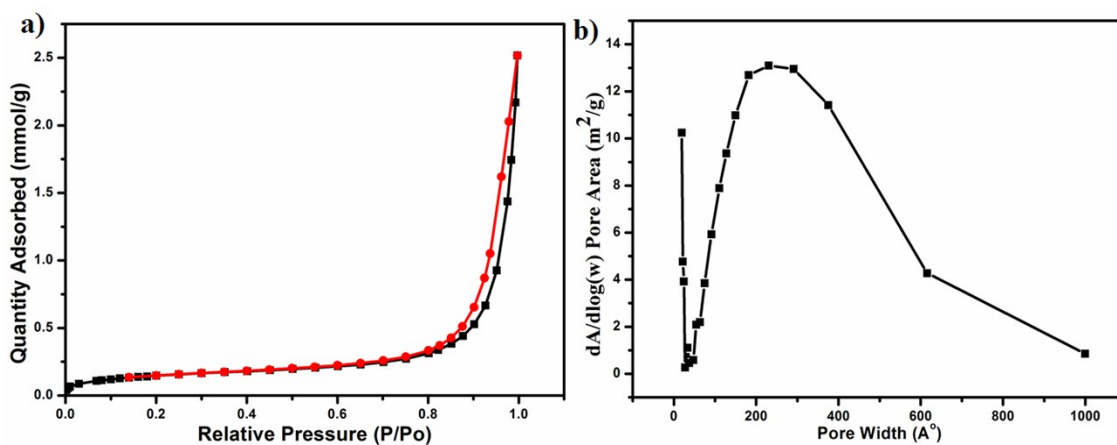

**Figure S1.** Nitrogen adsorption/desorption isotherms of the synthesized trypsin-CaCO<sub>3</sub> hybrid nanospheres (a) and the corresponding BJH pore size distribution (b).
